# Supplementary material for: Construction of high-density genetic linkage maps for orange-spotted grouper Epinephelus coioides using multiplexed shotgun genotyping
Source: PubMed Central journal article supplement (PMC3890575; doi:10.1186/1471-2156-14-113), 2013-12-01
Supplement: 1471-2156-14-113-S2.pdf [file 1471-2156-14-113-S2.pdf]

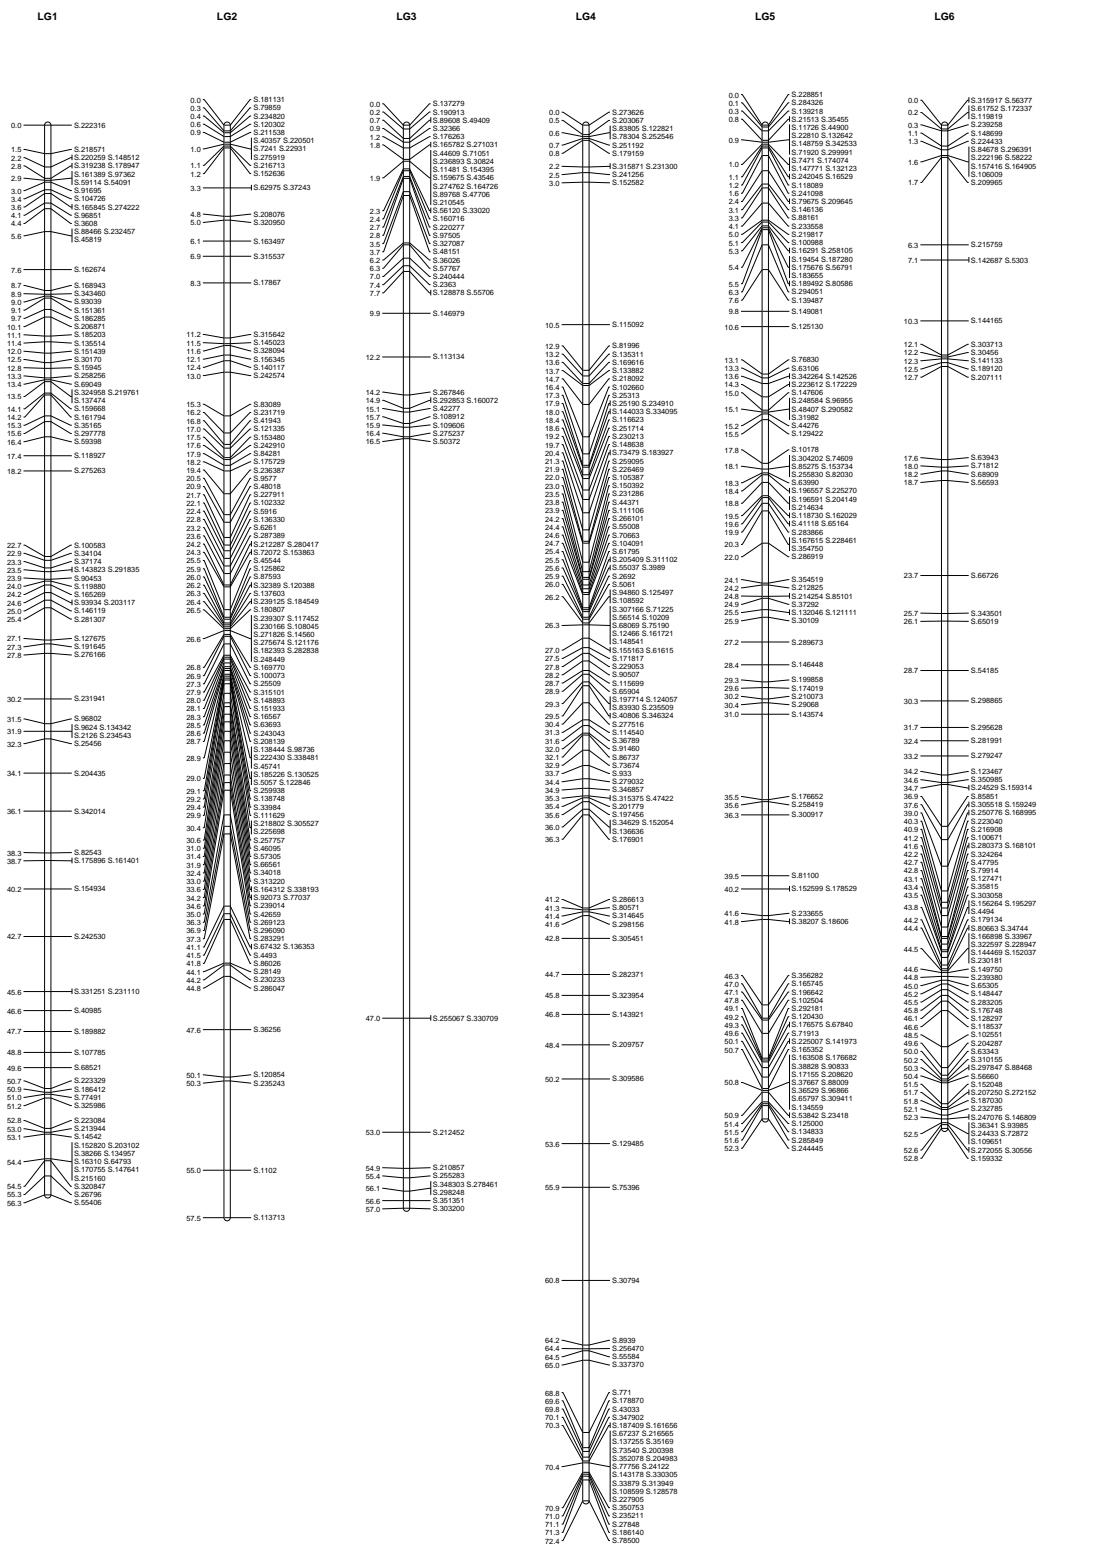

Figure S1. The female linkage map of orange-spotted grouper. The lengths of the linkage groups are based on Kosambi cM.



LG13

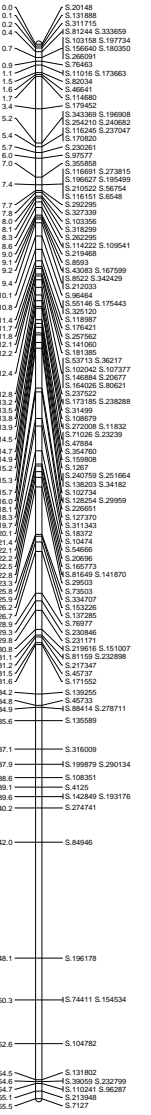

LG14

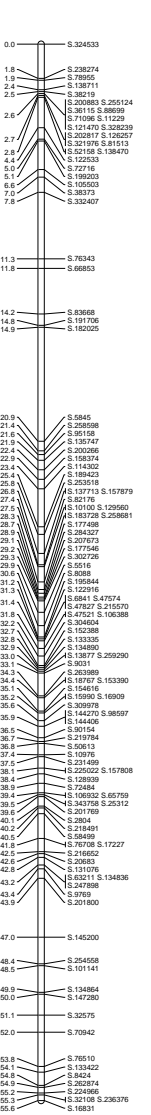

LG15

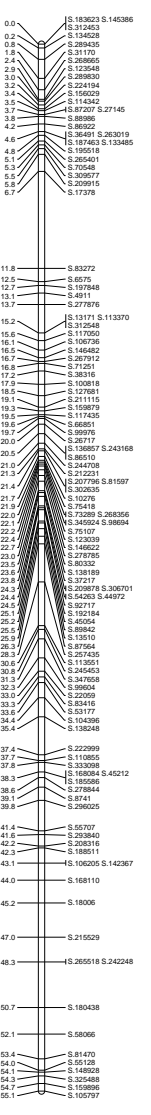

LG16

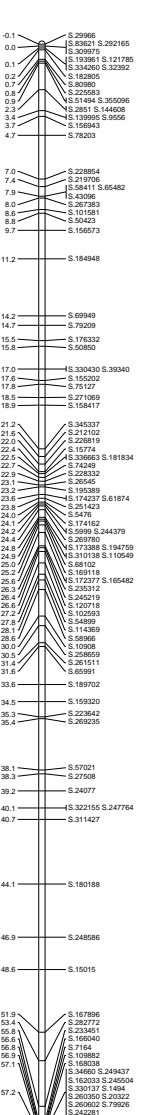

LG17

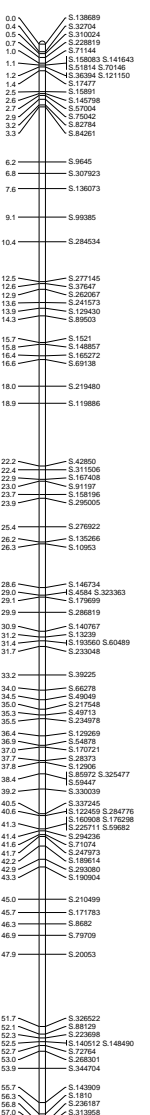

LG18

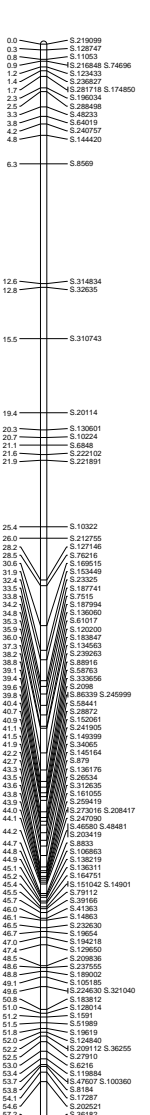

Figure S1 (continued)

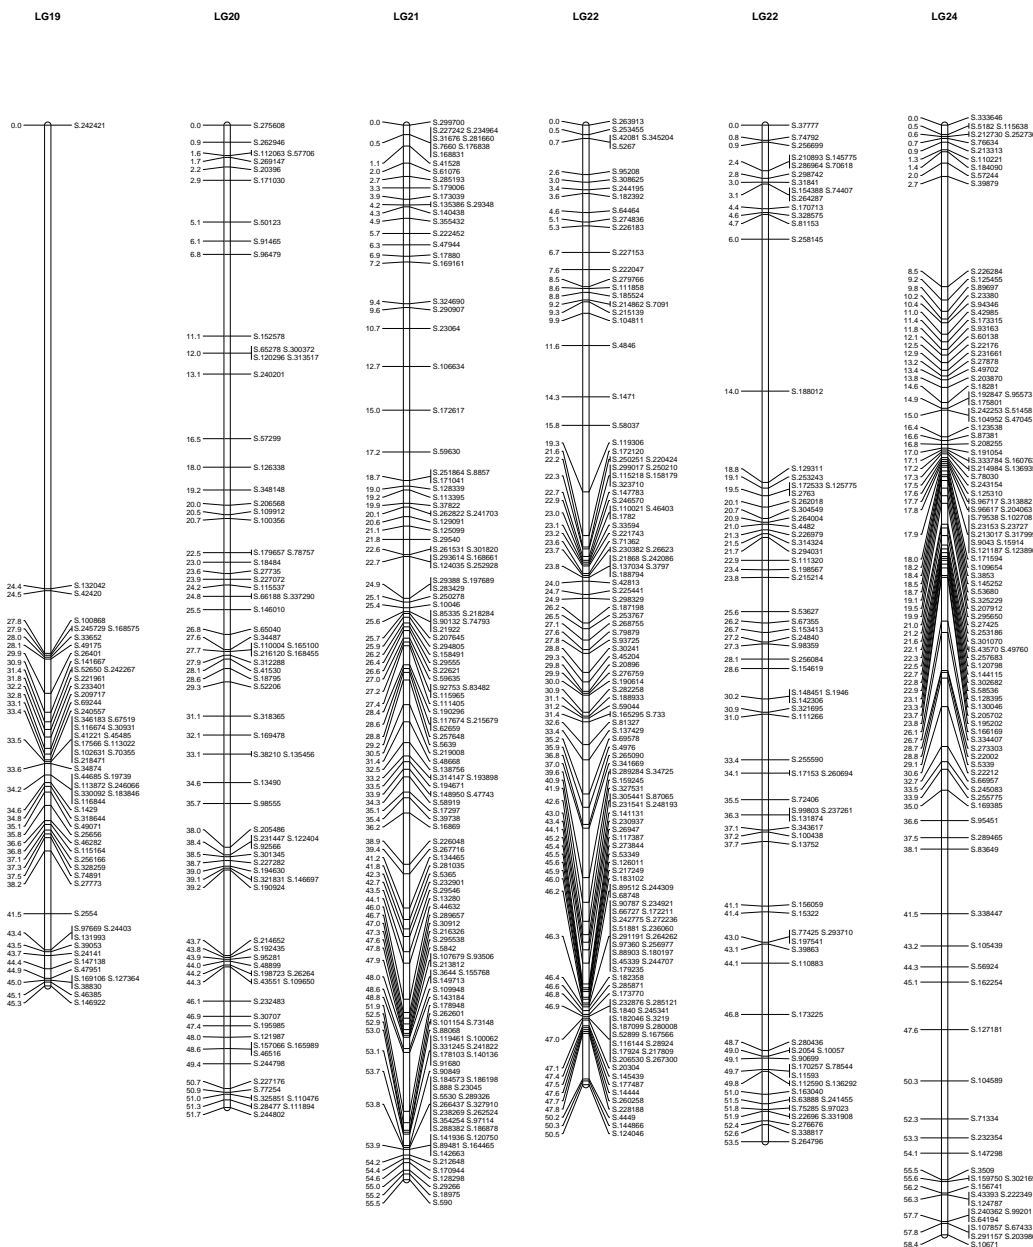

Figure S1 (continued)
