# Supplementary material for: Construction of high-density genetic linkage maps for orange-spotted grouper Epinephelus coioides using multiplexed shotgun genotyping
Source: PubMed Central journal article supplement (PMC3890575; doi:10.1186/1471-2156-14-113), 2013-12-01
Supplement: 1471-2156-14-113-S3.pdf [file 1471-2156-14-113-S3.pdf]

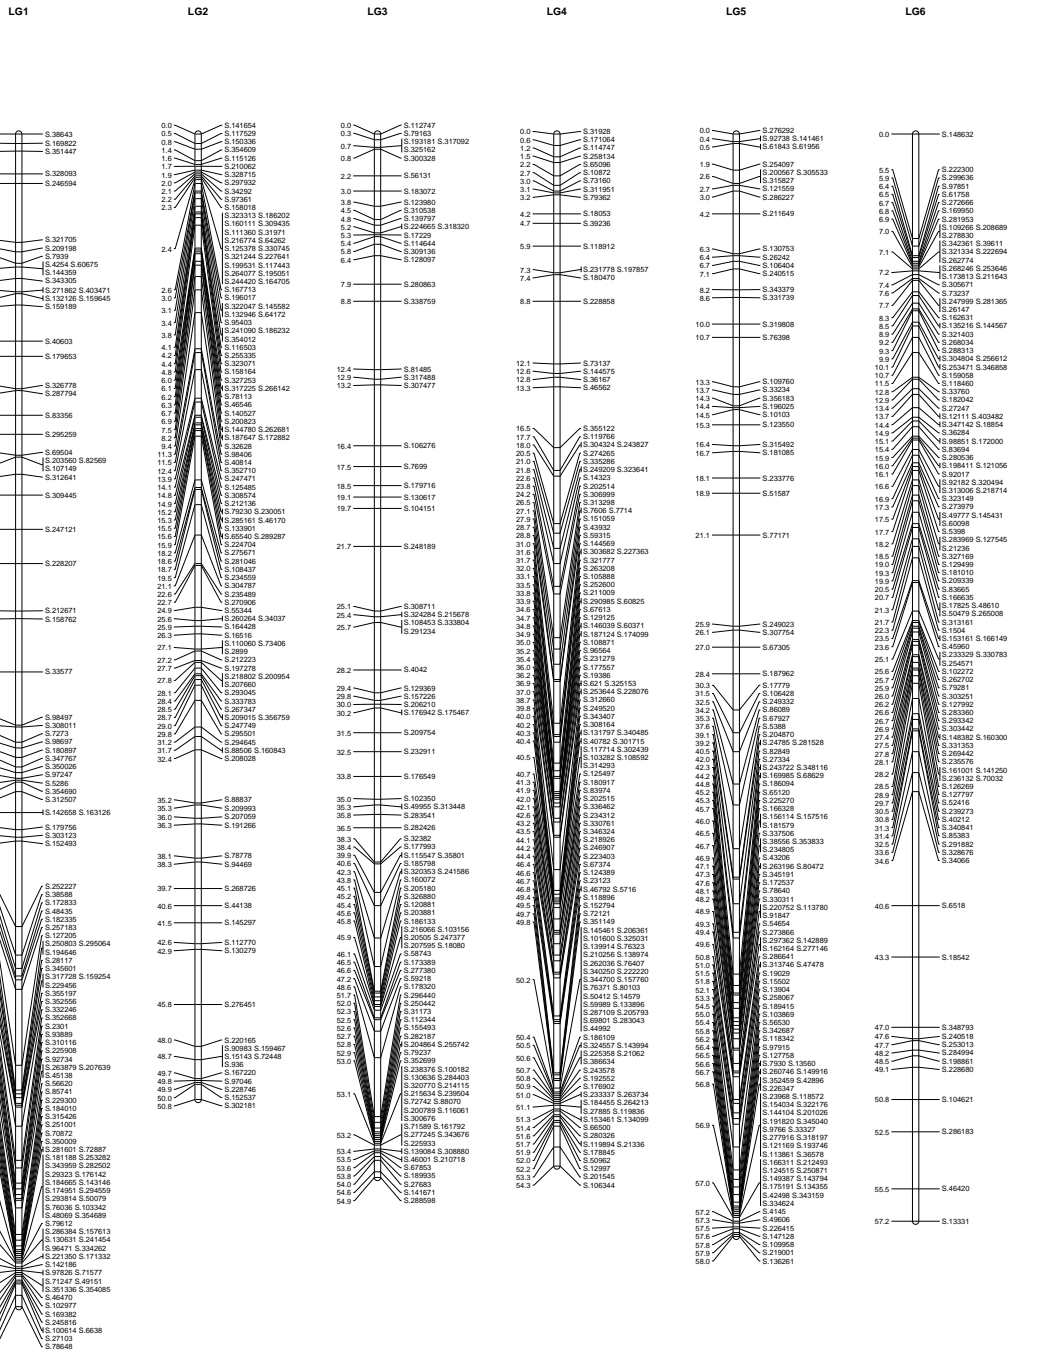

Figure S2. The male linkage map of orange-spotted grouper. The lengths of the linkage groups are based on Kosambi cM.

LG7

LG8

LG9

LG10

LG11

LG12

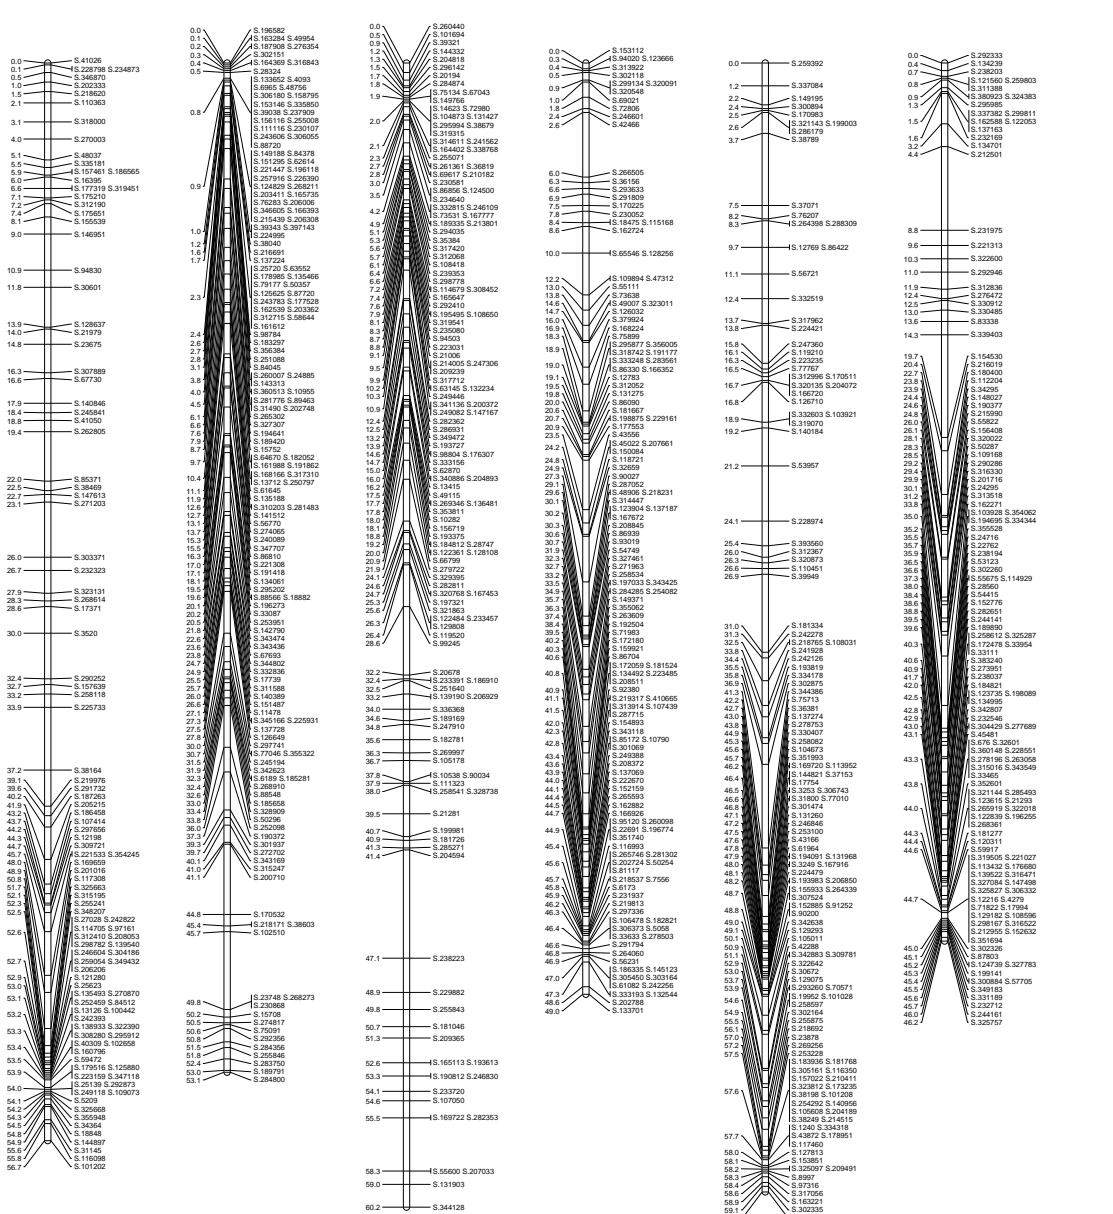

Figure S2 (continued)

LG13

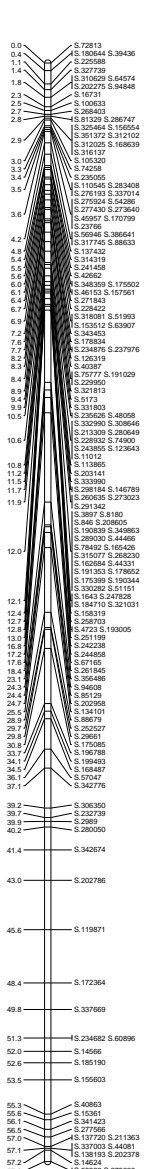

LG14

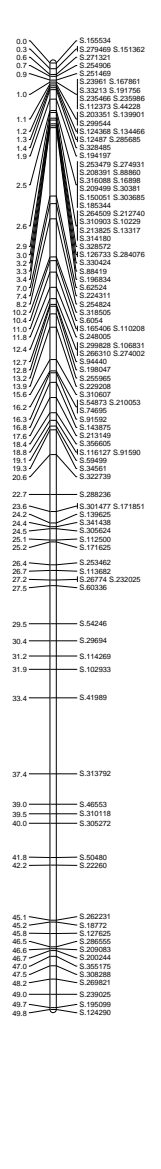

LG15

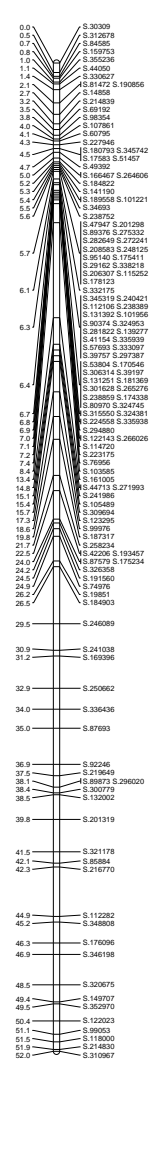

LG16

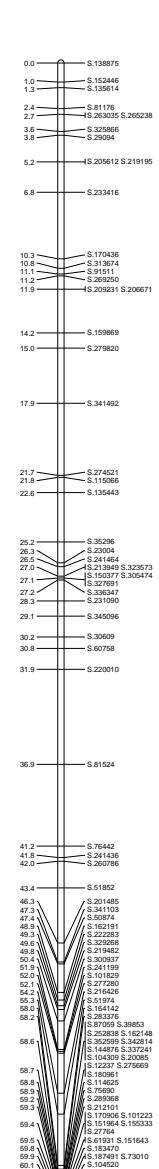

LG17

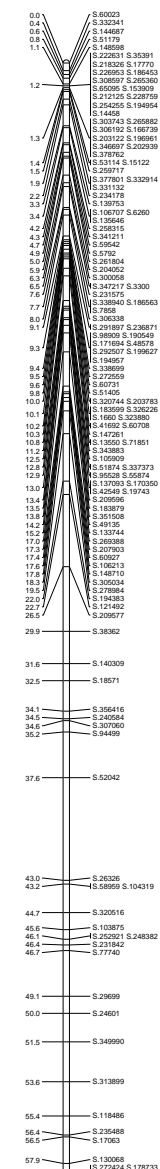

LG18

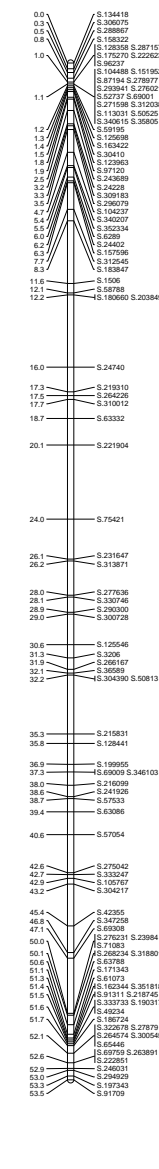

Figure S2 (continued)

LG19

LG20

LG21

LG22

LG23

LG24

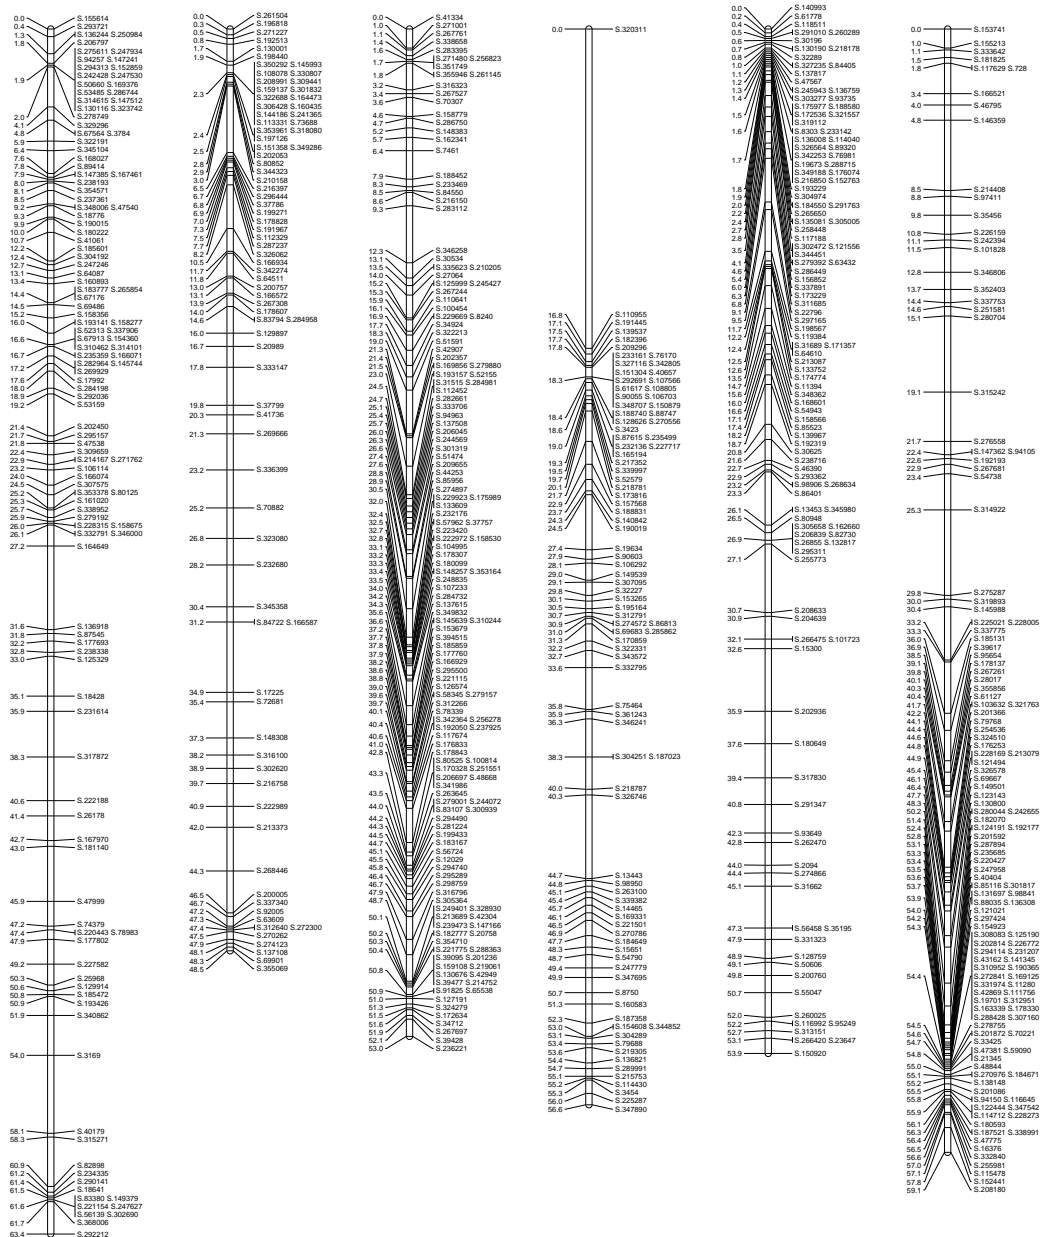

Figure S2 (continued)
